# Supplementary material for: Lactate and pyruvate promote oxidative stress resistance through hormetic ROS signaling
Source: PubMed Central journal article supplement (PMC6737085; doi:10.1038/s41419-019-1877-6), 2019-09-10
Supplement: 41419_2019_1877_MOESM1_ESM.pdf [file 41419_2019_1877_MOESM1_ESM.pdf]

## SUPPLEMENTARY INFORMATION

### **Lactate and pyruvate promote oxidative stress resistance through hormetic ROS signaling.**

Arnaud Tauffenberger<sup>1\*</sup>, Hubert Fiumelli<sup>1</sup>, Salam Almustafa<sup>1,2</sup>, and Pierre J. Magistretti<sup>1\*</sup>

<sup>1</sup>Laboratory for Cellular Imaging and Energetics, Biological and Environmental Sciences and Engineering Division, King Abdullah University of Science and Technology, Thuwal, 23955-6900, Kingdom of Saudi Arabia <sup>2</sup>Imam Abdulrahman bin Faisal University, Dammam, Kingdom of Saudi Arabia

\* Correspondance :

[pierre.magistretti@kaust.edu.sa](mailto:pierre.magistretti@kaust.edu.sa)  
4700 KAUST, Thuwal, 23955-6900, KSA  
+966

[arnaud.tauffenberger@kaust.edu.sa](mailto:arnaud.tauffenberger@kaust.edu.sa)  
4700 KAUST, Thuwal, 23955-6900, KSA  
+966540380273

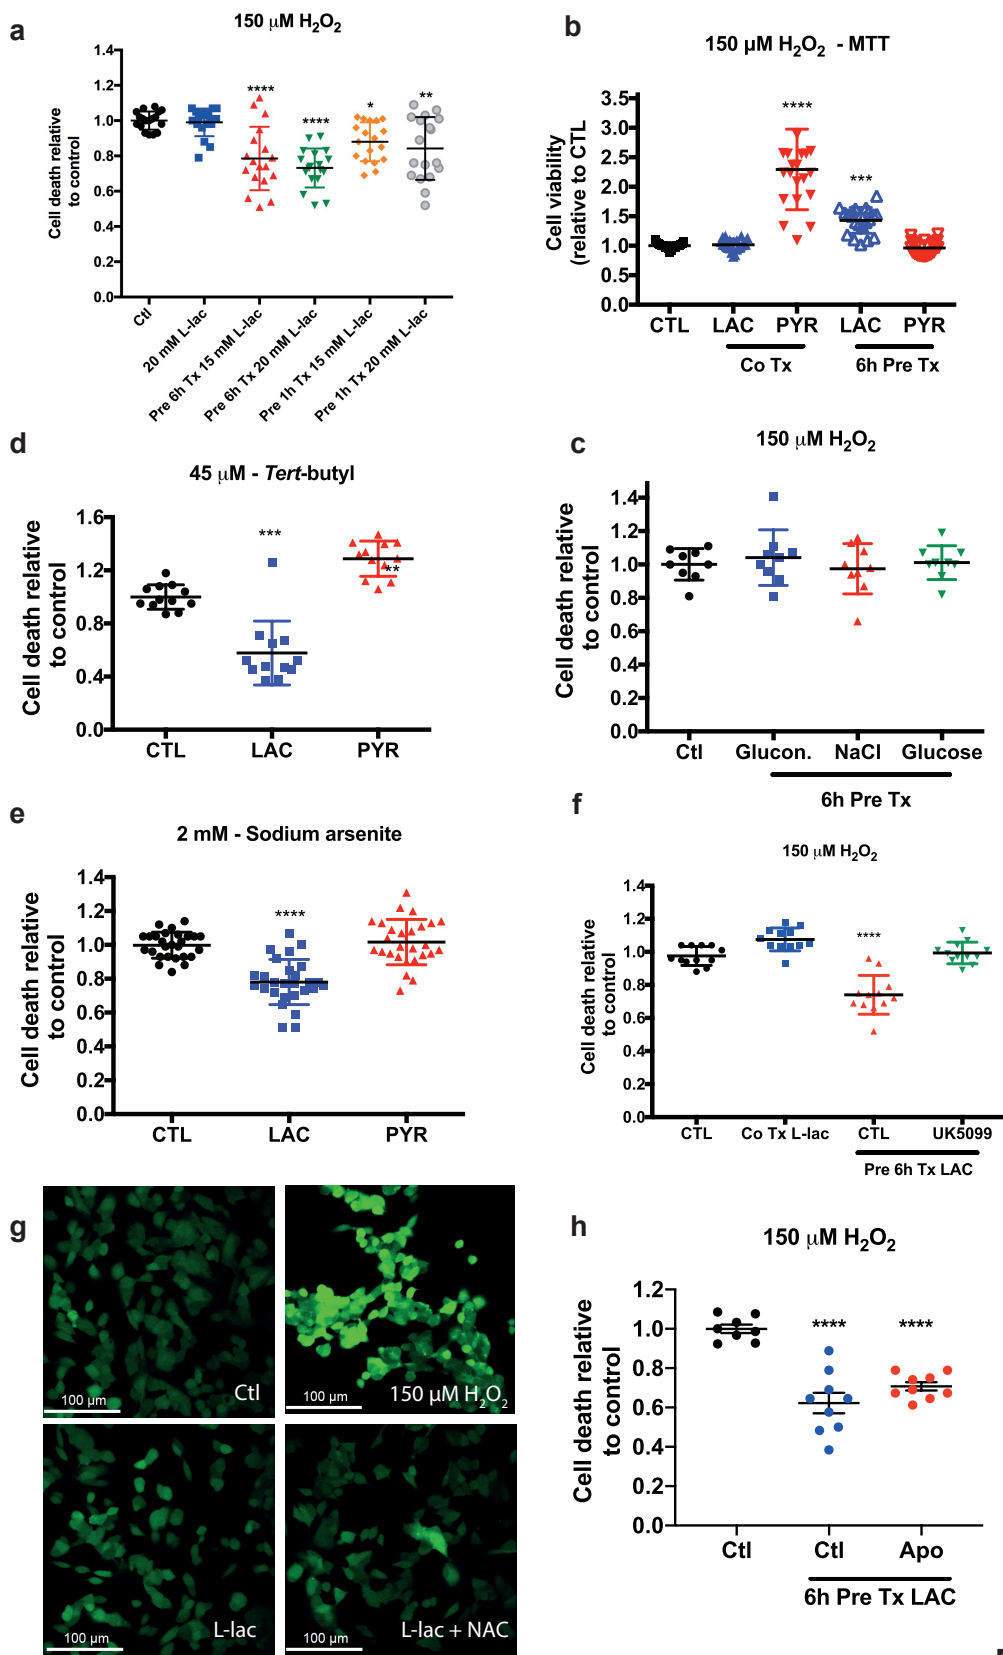

**FIG. S1**

**Supplementary Figure 1: Characterization of lactate protective response. (Related to Figure 1)**

**a)** Relative measures of cell death after 150  $\mu\text{M}$   $\text{H}_2\text{O}_2$  treatment upon pre-treatment with lactate (15mM -20mM) for different durations (1h – 6h). **b)** Relative measures of cell death induced by 150  $\mu\text{M}$   $\text{H}_2\text{O}_2$  as determined by the MTT assay upon pre-treatment with lactate (20 mM – 6h). **c)** A measure of cell death after 150  $\mu\text{M}$   $\text{H}_2\text{O}_2$  treatment upon pre-treatment with D-glucose, NaCl or Na-gluconate (all 20mM). **d-e)** Measure of cell death upon pre-treatment with lactate (20 mM – 6h) after treatment with 45  $\mu\text{M}$  tert-butyl **d)** or 2mM Sodium Arsenite **e)**. **f)** The measure of cell death after 150  $\mu\text{M}$   $\text{H}_2\text{O}_2$  and upon pre-treatment with lactate (20 mM – 6h) using MCT blocker UK5099. **g)** Confocal images of SH-SY5Y cells stained with  $\text{H}_2\text{DCFDA}$  (50  $\mu\text{M}$ ). Cells were treated with 150  $\mu\text{M}$   $\text{H}_2\text{O}_2$  for 30 min or with 20mM lactate for 6h. **h)** Relative measure of cell death after 150  $\mu\text{M}$   $\text{H}_2\text{O}_2$  treatment upon pre-treatment with lactate (20 mM) using NADPH oxidase inhibitor apocynin (50  $\mu\text{M}$ )

Bars are the average  $\pm$  SEM ( $N=4$ , \* $p<0.05$ , \*\* $p<0.01$ , \*\*\* $p<0.001$ , \*\*\*\* $p<0.0001$ )

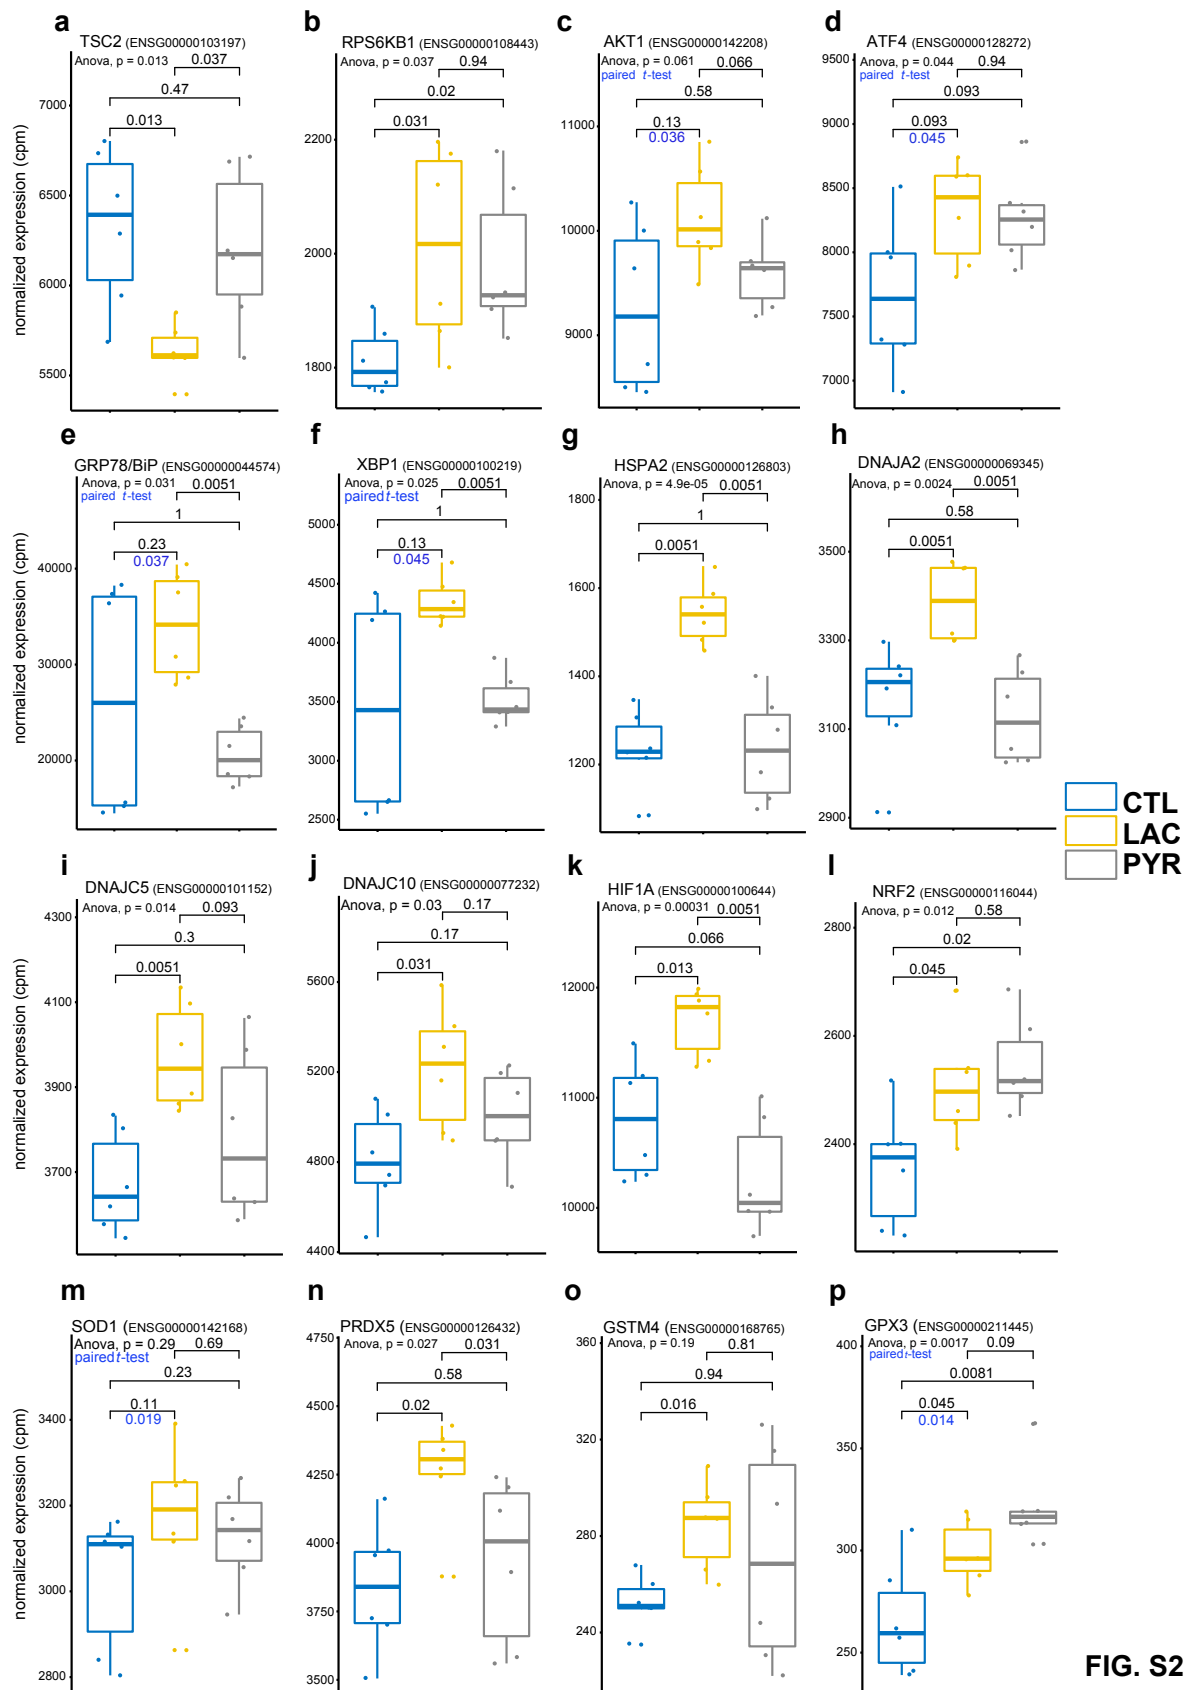

**FIG. S2**

**Supplementary Figure 2: Expression levels of genes differentially regulated by lactate when compared to control or lactate treatment identified in the RNAseq analysis of SH-SY5Y cells. (Related to Figure 2)**

Boxplots showing normalized transcript levels of mTOR and PI3K related candidates; **a)** TSC2, **b)** RPS6KB1, **c)** AKT1 and **D)** ATF4. Transcript levels for ER processing related candidates; **e)** GRP78/BiP, and **f)** XBP1, **g)** DNAJA2, **h)** DNAJC5, **i)** DNAJC10, **j)** HSPA2.

Transcripts levels of candidates related to ROS induction and detoxification; **k)** HIF1 $\alpha$ , **l)** NRF2, **m)** SOD1, **n)** PRDX53, **o)** GSTM4 and **p)** GPX3.

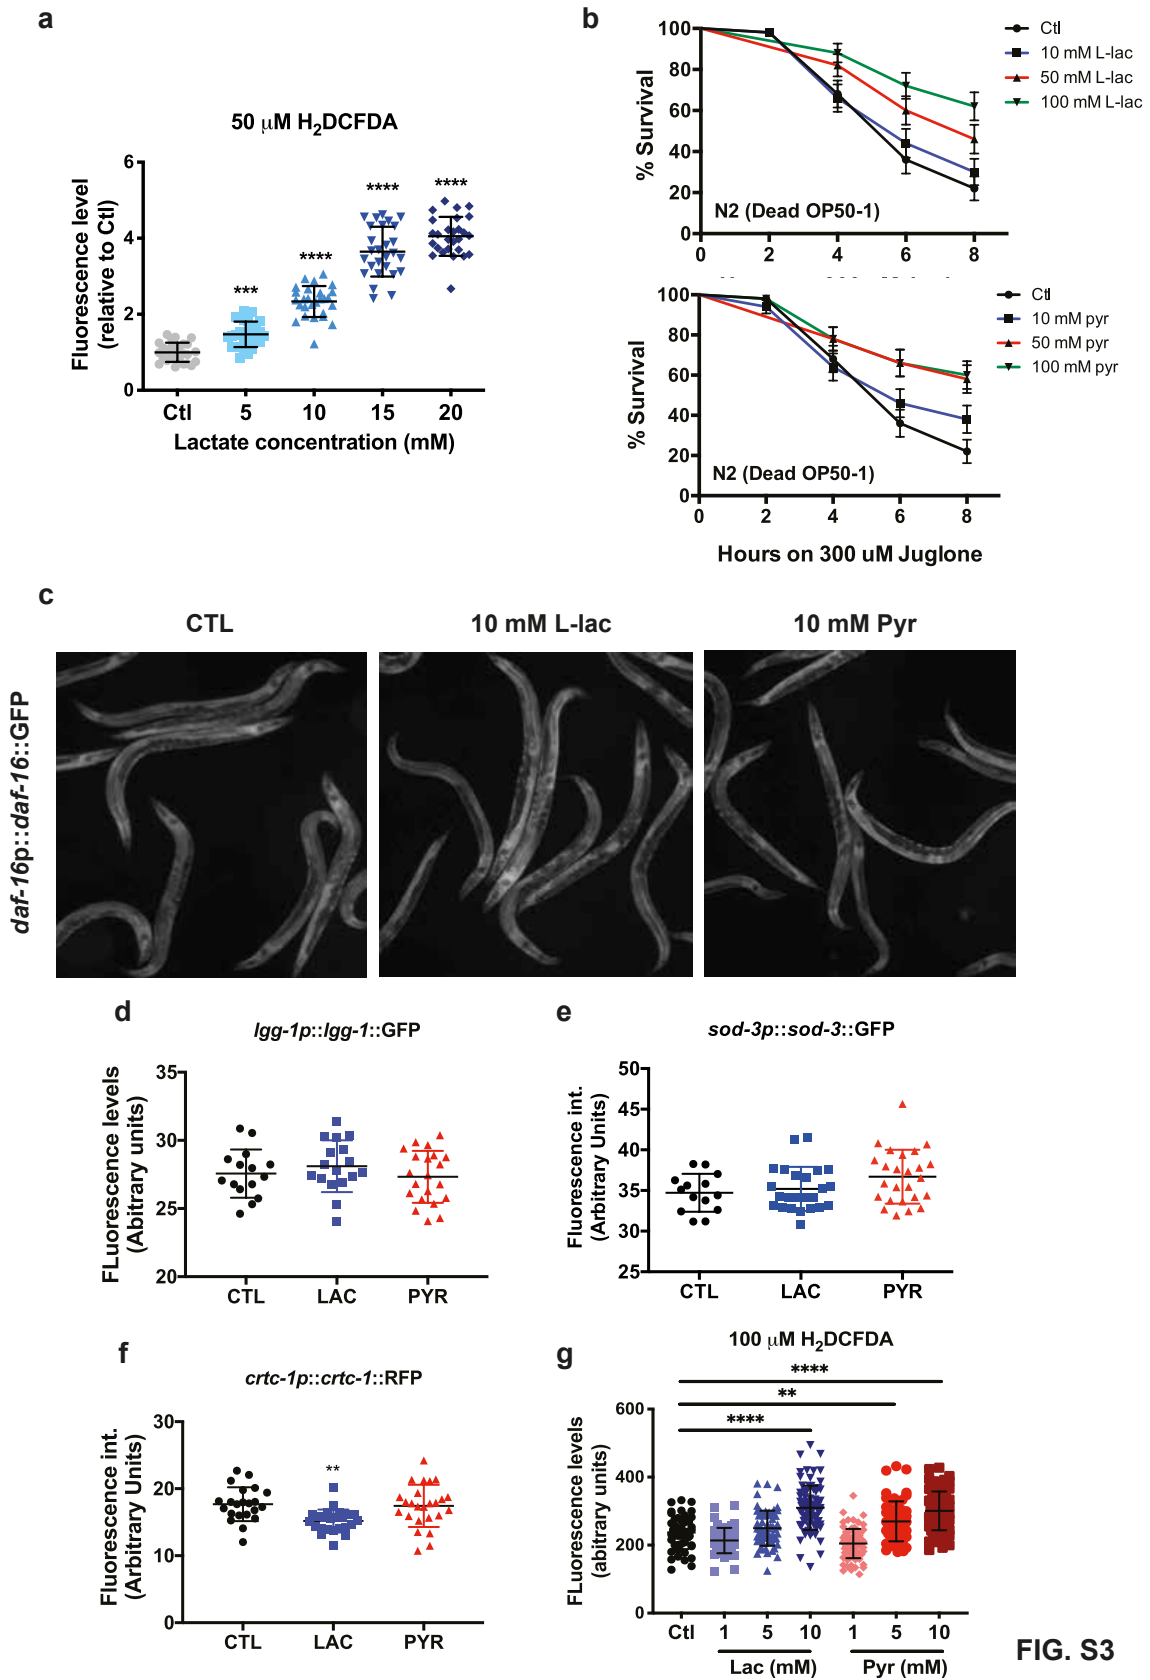

FIG. S3

**Supplementary Figure 3: Characterization of longevity phenotypes induced by lactate and pyruvate. (Related to figures 3 and 4)**

**a)** Measure of ROS in SH-SY5Y cells after 6h treatment with different doses of lactate.

**b)** Survival curves of wild-type (N2) animals treated with 300 $\mu$ M juglone and supplemented with 10, 50 and 100 mM lactate or pyruvate before the test. Worms were grown on dead OP50-1. Measure of expression for translational reporter of *daf-16* **c)**, *lgg-1* **d)**, *sod-3* **e)** and *crtc-1* **f)** after dietary supplementation with 10 mM lactate or pyruvate. **d)** Measure of ROS in wild-type (N2) animals at different concentrations of lactate or pyruvate.

Bars are the average  $\pm$  SEM (N=3, \*p<0.05, \*\*p<0.01, \*\*\*p<0.001 and \*\*\*\*p<0.0001)

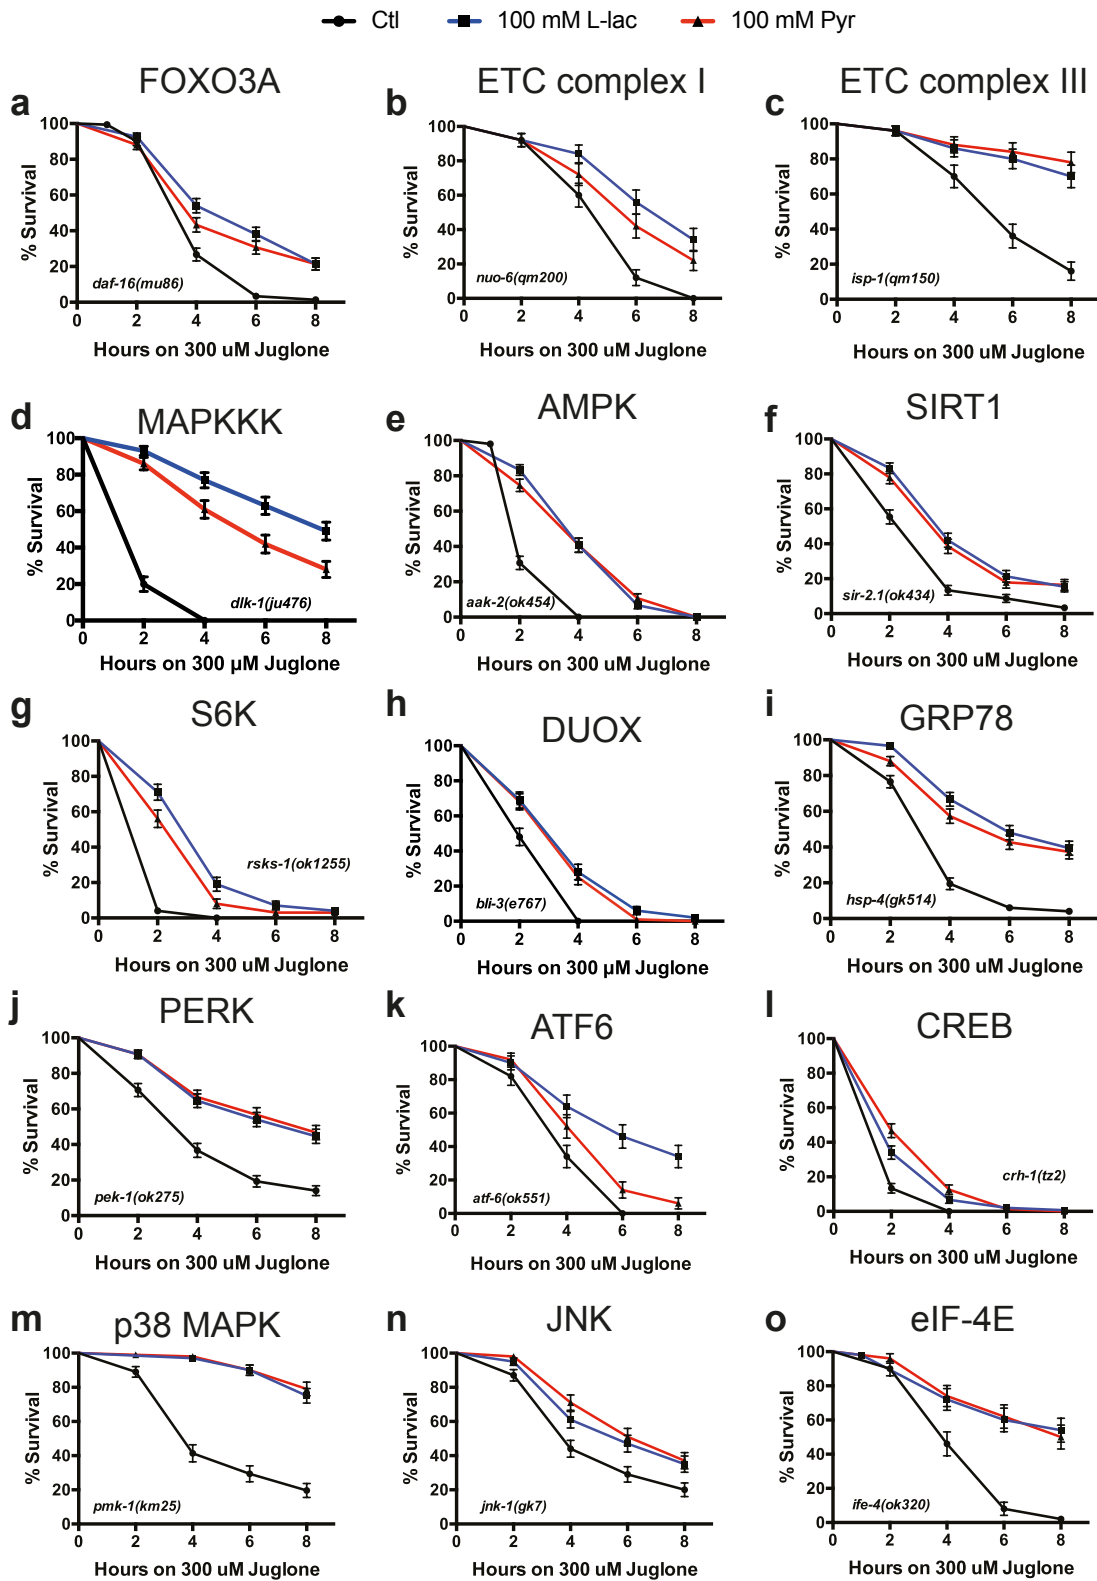

**FIG. S4**



**Supplementary Figure 4: Different metabolic sensitive pathways are not required for lactate and pyruvate stress resistance. (*Related to figure 5*)**

**a-o)** Survival curves of mutant nematodes treated 300 $\mu$ M juglone and supplemented with 100mM lactate or pyruvate. Mutated genes are indicated as an inset in the lower left or right corner of each graph, and mammalian orthologs are indicated above each graph.  $N=3$

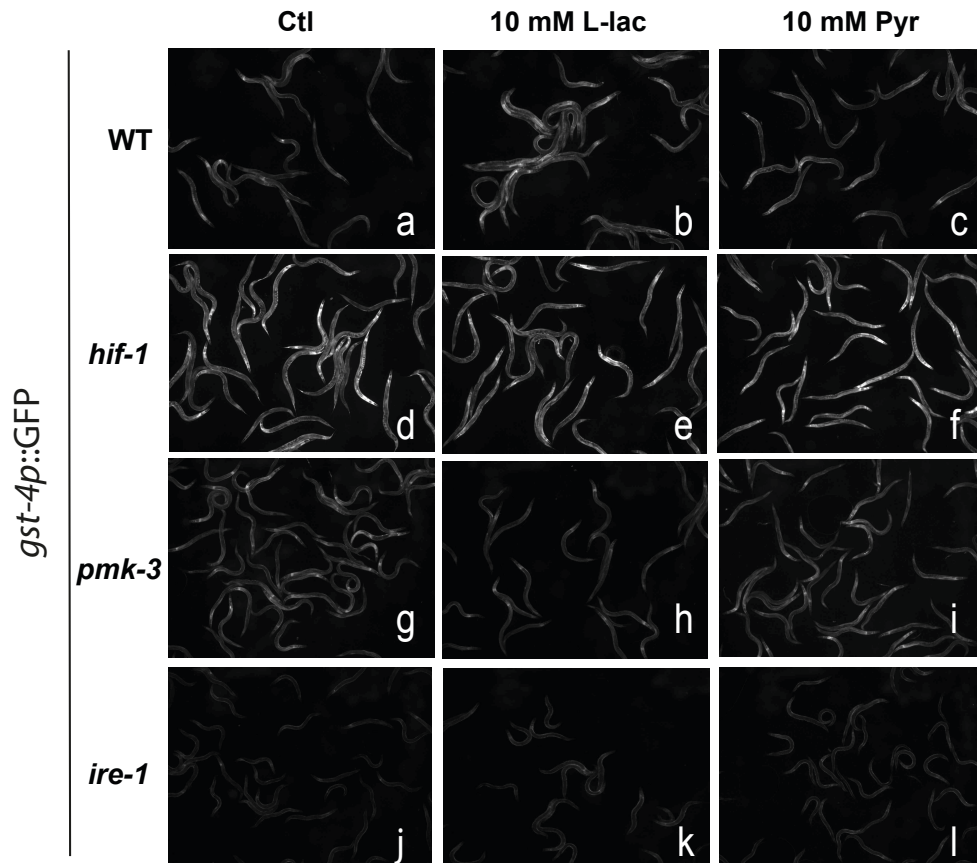

**Supplementary figure 5: Effects of lactate and pyruvate on the levels of *gst-4p::GFP* in wild-type and mutant animals. (Related to Figure 6)**

**a-c)** Fluorescent images of *gst-4p::GFP* in wild-type animals imaging upon 10 mM lactate or pyruvate diet supplementation. **d-f)** Animals with *hif-1* mutant background imaging upon 10 mM lactate or pyruvate diet supplementation. **g-i)** Animals with *pmk-3* mutant background imaging upon 10 mM lactate or pyruvate diet supplementation. **j-l)** Animals with *ire-1* mutant background imaging upon 10 mM lactate or pyruvate diet supplementation.
